# Supplementary material
Source: HighWire-hosted journal article supplement (https://innovations.bmj.com/highwire/filestream/137778/field_highwire_adjunct_files/0/bmjinnov-2020-000424supp001_data_supplement.pdf)
Supplement: bmjinnov-2020-000424supp001_data_supplement.pdf [file bmjinnov-2020-000424supp001_data_supplement.pdf]

**Supplementary information**

Appendix A: Search strategies:

(disrupt\* adj3 (innovat\* or technolog\*)).ab,ti. for the Ovid database and (disrupt\* N2 (innovat\* or technolog\*)). for the CINAHL database.

## Appendix B: Full table of extracted results:

| Author                 | Year | Country        | Type           | Article | Innovation                                         |
|------------------------|------|----------------|----------------|---------|----------------------------------------------------|
| Abrams <sup>1</sup>    | 2014 | USA            | Device         | Review  | E-cigarettes                                       |
| Adaji <sup>2</sup>     | 2018 | USA            | Processes      | Review  | Integrated psychiatric care                        |
| Alami <sup>3</sup>     | 2017 | Canada         | Digital Health | Review  | Digital health                                     |
| Alfonso <sup>4</sup>   | 2016 | Spain          | Device         | Review  | Bioresorbable vascular scaffolds                   |
| Alston <sup>5</sup>    | 2003 | USA            | Digital Health | Review  | Web based delivery model for primary care services |
| Arora <sup>6</sup>     | 2010 | USA            | Processes      | Trial   | ECHO (Extension for Community Healthcare Outcomes) |
| Asgar <sup>7</sup>     | 2018 | Canada         | Technique      | Review  | TAVI (Transcatheter Aortic Valve Implantation)     |
| Ashrafian <sup>8</sup> | 2017 | United Kingdom | Technique      | Review  | Robotic surgery                                    |
| Badlani <sup>9</sup>   | 2012 | USA            | Processes      | Review  | Single specialty hospitals                         |
| Bagley <sup>10</sup>   | 2015 | United Kingdom | Education      | Review  | Distance learning                                  |

|                          |      |                |                |                     |                                                            |
|--------------------------|------|----------------|----------------|---------------------|------------------------------------------------------------|
| Bagot <sup>11</sup>      | 2015 | USA            | Digital Health | Observational trial | Telemedicine in the acute health setting (stroke medicine) |
| Baldwin <sup>12</sup>    | 2007 | United Kingdom | Digital Health | Review              | Mobile health in the context of ED                         |
| Barker <sup>13</sup>     | 2016 | USA            | Technique      | Review              | TAVR (Transcatheter aortic valve replacement)              |
| Ben-Or <sup>14</sup>     | 2013 | USA            | Device         | Review              | da Vinci robot                                             |
| Berlin <sup>15</sup>     | 2014 | USA            | Technique      | Review              | TAVI                                                       |
| Best <sup>16</sup>       | 2006 | USA            | Basic Science  | Review              | Nanomedicine                                               |
| Bhavan <sup>17</sup>     | 2016 | USA            | Processes      | Review              | Self-administered outpatient antibiotic therapy (OPAT)     |
| Bibby <sup>18</sup>      | 2013 | USA            | Basic Science  | Review              | 'Shotgun' metagenomic sequencing                           |
| Birchall <sup>19</sup>   | 2014 | United Kingdom | Basic Science  | Review              | Tissue engineering                                         |
| Bluestein <sup>20</sup>  | 2013 | USA            | Technique      | Review              | Device thrombogenicity emulation                           |
| Boisguerin <sup>21</sup> | 2014 | Germany        | Basic Science  | Review              | Mutation-targeting RNA-based vaccines                      |

|                                   |      |             |                |        |                                                                   |
|-----------------------------------|------|-------------|----------------|--------|-------------------------------------------------------------------|
| Borges <sup>22</sup>              | 2015 | Portugal    | Digital Health | Review | Radio-frequency energy harvesting for wearable sensors            |
| Boston-Fleischhauer <sup>23</sup> | 2016 | USA         | Processes      | Review | Acute care organisation                                           |
| Bradley <sup>24</sup>             | 2009 | USA         | Technique      | Review | MR guided focused ultrasound surgery                              |
| Broome <sup>25</sup>              | 2014 | USA         | Education      | Review | Open access publishing                                            |
| Burkhart <sup>26</sup>            | 2015 | USA         | Technique      | Review | Arthroscopic rotator cuff repair                                  |
| Burns <sup>27</sup>               | 2011 | USA         | Processes      | Review | Single specialty hospitals                                        |
| Cable <sup>28</sup>               | 2014 | New Zealand | Education      | Review | Interprofessional master's program in health profession education |
| Cadogan <sup>29</sup>             | 2014 | Australia   | Education      | Review | Free Open Access Medical education (FOAM)                         |
| Cai <sup>30</sup>                 | 2016 | USA         | Basic Science  | Review | Mass spectrometry-based proteomics                                |
| Castle <sup>31</sup>              | 2016 | USA         | Processes      | Review | Accountable care units                                            |
| Chase <sup>32</sup>               | 2006 | USA         | Processes      | Review | Nurse practitioners                                               |

|                                |      |        |               |        |                                                   |
|--------------------------------|------|--------|---------------|--------|---------------------------------------------------|
| Chen <sup>33</sup>             | 2014 | China  | Device        | Review | Wireless capsule endoscopy                        |
| Chew <sup>34</sup>             | 2018 | Canada | Device        | Review | Leadless pacemakers                               |
| Ciuti <sup>35</sup>            | 2016 | Italy  | Device        | Review | Wireless capsule endoscopy                        |
| Clarke <sup>36</sup>           | 2013 | USA    | Technique     | Review | 'UroLift' procedure                               |
| Cloft <sup>37</sup>            | 2012 | USA    | Technique     | Trial  | Flow diversion in neurosurgical procedures        |
| Cohen <sup>38</sup>            | 2017 | USA    | Basic Science | Review | In vitro fertilisation and in vitro gametogenesis |
| Connaughton <sup>39</sup>      | 2014 | USA    | Device        | Review | Biofilm in orthopaedic implants                   |
| Contandriopoulos <sup>40</sup> | 2016 | Canada | Processes     | Review | Nurse Practitioners                               |
| Correa <sup>41</sup>           | 2017 | USA    | Device        | Review | E-cigarettes                                      |
| Couch <sup>46</sup>            | 2010 | USA    | Technique     | Trial  | Trans-oral robotic surgery                        |
| Crobeddu <sup>42</sup>         | 2013 | USA    | Technique     | Review | Flow diversion in neurosurgical procedures        |
| D'Alfonso <sup>43</sup>        | 2018 | USA    | Processes     | Review | Kaiser's School of Nursing                        |

|                           |      |           |               |                     |                                                                   |
|---------------------------|------|-----------|---------------|---------------------|-------------------------------------------------------------------|
| Dawn <sup>44</sup>        | 2017 | USA       | Device        | Review              | 3D printing in cardiac surgery                                    |
| De Vos <sup>45</sup>      | 2016 | France    | Basic Science | Review              | Human induced pluripotent stem cells                              |
| Del Vecchio <sup>47</sup> | 2011 | USA       | Technique     | Review              | Fat grafting to breasts                                           |
| Donaldson <sup>48</sup>   | 2008 | USA       | Processes     | Review              | Re-organisation of care system based on Patient Reported Outcomes |
| Doss <sup>49</sup>        | 2016 | Australia | Processes     | Review              | Outpatient management of knee osteoarthritis                      |
| Downing <sup>50</sup>     | 2009 | USA       | Basic Science | Review              | Clinical genomics within context of personalised medicine         |
| Drum <sup>51</sup>        | 2016 | USA       | Diagnostics   | Review              | Pulse oximetry                                                    |
| Eckert <sup>52</sup>      | 2014 | USA       | Technique     | Review              | Fluoridation of water                                             |
| Edmonson <sup>53</sup>    | 2016 | USA       | Processes     | Review              | Nurses performing cardiopulmonary resuscitation (CPR)             |
| Edmunds <sup>54</sup>     | 2002 | USA       | Processes     | Review              | Nurse Practitioners                                               |
| Eltoum <sup>55</sup>      | 2012 | USA       | Diagnostics   | Observational trial | Endoscopic ultrasound-guided                                      |

|                                  |      |        |                |                     |                                                |
|----------------------------------|------|--------|----------------|---------------------|------------------------------------------------|
|                                  |      |        |                |                     | fine-needle aspiration                         |
| Fagerstrom <sup>56</sup>         | 2015 | USA    | Device         | Review              | E-cigarettes                                   |
| Felker <sup>57</sup>             | 2015 | USA    | Digital Health | Review              | Big data analysis                              |
| Feltus <sup>58</sup>             | 2015 | USA    | Basic Science  | Review              | High throughput DNA sequencing                 |
| Fernandez Carrillo <sup>59</sup> | 2017 | Spain  | Basic Science  | Review              | Direct acting anti-viral agents in Hepatitis C |
| Gerbault <sup>60</sup>           | 2018 | France | Technique      | Review              | Piezosurgery                                   |
| Giatsidis <sup>61</sup>          | 2017 | USA    | Technique      | Review              | Face transplant                                |
| Gibson <sup>62</sup>             | 2000 | USA    | Education      | Review              | Distance learning                              |
| Gilchrist <sup>63</sup>          | 2017 | USA    | Technique      | Review              | Trans-radial endovascular access               |
| Glabman <sup>64</sup>            | 2009 | USA    | Processes      | Review              | Retail clinics                                 |
| Goeddel <sup>65</sup>            | 2015 | USA    | Processes      | Review              | Perioperative Surgical Home                    |
| Grady <sup>66</sup>              | 2014 | USA    | Digital Health | Review              | Telemedicine                                   |
| Green <sup>67</sup>              | 2004 | USA    | Technique      | Review              | Endovascular surgery                           |
| Gupte <sup>68</sup>              | 2016 | USA    | Digital Health | Observational trial | Telemedicine                                   |

|                             |      |         |                |        |                                                                                                                     |
|-----------------------------|------|---------|----------------|--------|---------------------------------------------------------------------------------------------------------------------|
| Hanna <sup>69</sup>         | 2017 | USA     | Digital Health | Review | Health informatics                                                                                                  |
| Hans <sup>70</sup>          | 2018 | Canada  | Digital Health | Review | Mobile Health                                                                                                       |
| Hansen <sup>71</sup>        | 2012 | USA     | Basic Science  | Review | Metabolomics                                                                                                        |
| Hansen <sup>72</sup>        | 2009 | USA     | Technique      | Review | Mobile fluoroscopic imaging in orthopaedic surgery                                                                  |
| Hansen-Turton <sup>73</sup> | 2007 | USA     | Processes      | Review | Retail clinics                                                                                                      |
| Harris <sup>74</sup>        | 2010 | USA     | Education      | Review | Distance learning                                                                                                   |
| Hart <sup>75</sup>          | 2015 | Germany | Basic Science  | Review | Communicative re-programming (anakinosis) with cellular therapies in situ for treating refractory metastatic cancer |
| Hathaway <sup>76</sup>      | 2006 | USA     | Education      | Review | Doctor of Nursing practice                                                                                          |
| Havighurst <sup>77</sup>    | 2008 | USA     | Processes      | Review | Health tourism                                                                                                      |
| Hawkins <sup>78</sup>       | 2017 | USA     | Technique      | Review | TAVR                                                                                                                |
| Heckers <sup>79</sup>       | 2017 | USA     | Processes      | Review | Systems Neuroscience of Psychosis (SyNoPsis)                                                                        |



|                          |      |              |                |                     |                                                                                                   |
|--------------------------|------|--------------|----------------|---------------------|---------------------------------------------------------------------------------------------------|
| Heerenma <sup>80</sup>   | 2016 | Netherlands  | Basic Science  | Review              | DNA sequencing                                                                                    |
| Heidesch <sup>81</sup>   | 2008 | USA          | Processes      | Review              | Nurse practitioners                                                                               |
| Helmus <sup>82</sup>     | 2008 | USA          | Basic Science  | Review              | Bio-compatibility                                                                                 |
| Hermiller <sup>83</sup>  | 2005 | USA          | Device         | Review              | Drug eluting stents                                                                               |
| Holderried <sup>84</sup> | 2017 | Germany      | Digital Health | Review              | eHealth in otorhinolaryngology                                                                    |
| Househ <sup>85</sup>     | 2017 | Saudi Arabia | Digital Health | Review              | Health informatics                                                                                |
| Huber <sup>86</sup>      | 2007 | USA          | Device         | Trial               | Functional pulmonary valved stent                                                                 |
| Hui <sup>87</sup>        | 2017 | USA          | Device         | Review              | 3D printing                                                                                       |
| Hultman <sup>88</sup>    | 2013 | USA          | Technique      | Review              | Autologous reconstruction                                                                         |
| Hultman <sup>89</sup>    | 2014 | USA          | Technique      | Review              | Laser treatment to treat burn scars                                                               |
| Hunt <sup>90</sup>       | 2017 | Australia    | Digital Health | Review              | Hireup - online platform for people with disability to select and manage their own support worker |
| Hurks <sup>91</sup>      | 2015 | USA          | Technique      | Observational trial | Endovascular surgery                                                                              |

|                          |      |          |                |        |                                                                                             |
|--------------------------|------|----------|----------------|--------|---------------------------------------------------------------------------------------------|
| Hussain <sup>92</sup>    | 2015 | Malaysia | Digital Health | Review | Medical smartphone apps                                                                     |
| Huston <sup>93</sup>     | 2018 | USA      | Education      | Review | Simulation based nursing teaching                                                           |
| Hutchinson <sup>94</sup> | 2017 | USA      | Diagnostics    | Review | Prostate MRI                                                                                |
| Hutchinson <sup>95</sup> | 2018 | USA      | Technique      | Review | Stereotactic radio-ablation                                                                 |
| Hynynen <sup>96</sup>    | 2016 | Canada   | Technique      | Review | Focussed ultrasound as non-invasive therapeutic energy delivery modality                    |
| Iglehart <sup>97</sup>   | 2014 | USA      | Digital Health | Review | Telemedicine                                                                                |
| Jackrel <sup>98</sup>    | 2015 | USA      | Basic Science  | Review | Agents that reverse protein misfolding – Parkinson's Disease, Amyotrophic Lateral Sclerosis |
| Jacobson <sup>99</sup>   | 2011 | USA      | Processes      | Review | Affordable Care Act                                                                         |
| Jameson <sup>100</sup>   | 2014 | USA      | Digital Health | Review | Home monitoring                                                                             |
| Jha <sup>101</sup>       | 2012 | USA      | Diagnostics    | Review | CT scan                                                                                     |
| Jilla <sup>102,103</sup> | 2018 | USA      | Device         | Review | Over the counter hearing aids                                                               |

|                          |      |                |                |        |                                                                                  |
|--------------------------|------|----------------|----------------|--------|----------------------------------------------------------------------------------|
| Jolesz <sup>104</sup>    | 2009 | USA            | Technique      | Review | MRI-guided focused ultrasound surgery                                            |
| Jones <sup>105</sup>     | 2016 | USA            | Device         | Review | 3D printing                                                                      |
| Jordan <sup>106</sup>    | 2015 | USA            | Digital Health | Review | Big data analysis                                                                |
| Kain <sup>107</sup>      | 2015 | USA            | Processes      | Review | Perioperative surgical home                                                      |
| Kaissi <sup>108</sup>    | 2016 | USA            | Processes      | Review | Retail clinics                                                                   |
| Kallen <sup>109</sup>    | 2013 | Germany        | Basic Science  | Review | Self-adjuvanted RNA active vaccines                                              |
| Kancharla <sup>110</sup> | 2017 | USA            | Device         | Review | Leadless pacemakers                                                              |
| Kaslow <sup>111</sup>    | 2004 | USA            | Basic Science  | Review | Gene based vaccine                                                               |
| Kavic <sup>112</sup>     | 2003 | USA            | Technique      | Review | Laparoscopic surgery                                                             |
| Kazdin <sup>113</sup>    | 2017 | USA            | Digital Health | Review | Telemedicine                                                                     |
| Keller <sup>114</sup>    | 2018 | United Kingdom | Digital Health | Review | #colorectalresearch<br>- use of hashtag in social media to disseminate knowledge |
| Kenagy <sup>115</sup>    | 2002 | USA            | Processes      | Review | Ambulatory Surgical Centres                                                      |
| Kerfoot <sup>116</sup>   | 2004 | USA            | Processes      | Review | Affordable Care Act                                                              |

|                          |      |                |                |        |                                              |
|--------------------------|------|----------------|----------------|--------|----------------------------------------------|
| Khor <sup>117</sup>      | 2016 | United Kingdom | Digital Health | Review | Augmented reality in surgery                 |
| Kibbe <sup>118</sup>     | 2008 | USA            | Digital Health | Review | Health informatics                           |
| Kiechle <sup>119</sup>   | 2014 | USA            | Basic Science  | Review | Whole genome sequencing                      |
| Kissinger <sup>120</sup> | 2008 | USA            | Processes      | Review | Retail clinics                               |
| Kittaneh <sup>121</sup>  | 2013 | USA            | Basic Science  | Review | Clinical genomics in breast cancer treatment |
| Kneebone <sup>122</sup>  | 2010 | United Kingdom | Education      | Review | 'Distributed simulation'                     |
| Kobewka <sup>123</sup>   | 2018 | Canada         | Digital Health | Review | Online doctors                               |
| Kosinski <sup>124</sup>  | 2012 | USA            | Processes      | Review | Business model in healthcare                 |
| Krakower <sup>125</sup>  | 2017 | USA            | Processes      | Review | Pre-exposure prophylaxis for HIV             |
| Kricka <sup>126</sup>    | 2016 | USA            | Digital Health | Review | Big data analysis                            |
| Kurzock <sup>127</sup>   | 2015 | USA            | Basic Science  | Review | Next generation sequencing                   |
| Kushins <sup>128</sup>   | 2017 | USA            | Processes      | Review | Physicians assistants in rural USA           |
| Lauer <sup>129</sup>     | 2013 | USA            | Education      | Review | Randomised registry trials                   |

|                           |      |                |                |        |                                                                        |
|---------------------------|------|----------------|----------------|--------|------------------------------------------------------------------------|
| Leff <sup>130</sup>       | 2017 | United Kingdom | Technique      | Review | Margin assessment – bio-impedance, mass spectrometry, optical, imaging |
| Lesser <sup>131</sup>     | 2007 | USA            | Diagnostics    | Review | Nerve conduction study                                                 |
| Levy <sup>132</sup>       | 2008 | USA            | Digital Health | Review | Role of computers in modernising radiology                             |
| Li <sup>133</sup>         | 2012 | Australia      | Processes      | Review | Nurse Practitioners                                                    |
| Lindsey <sup>134</sup>    | 2015 | USA            | Basic Science  | Review | Mass spectrometry-based proteomics                                     |
| Loo <sup>135</sup>        | 2016 | United Kingdom | Device         | Review | 3D printing                                                            |
| Louizos <sup>136</sup>    | 2012 | USA            | Basic Science  | Review | Nanotechnology                                                         |
| Ma <sup>137</sup>         | 2013 | USA            | Education      | Review | Open access genomics modules                                           |
| MacConaill <sup>138</sup> | 2010 | USA            | Basic Science  | Review | Parallel DNA sequencing in cancer genome sequencing                    |
| Mack <sup>139</sup>       | 2012 | USA            | Technique      | Review | TAVI                                                                   |
| Macnab <sup>140</sup>     | 2014 | Canada         | Basic Science  | Review | Near infrared spectrophotometry                                        |
| Malek <sup>141</sup>      | 2017 | Germany        | Digital Health | Review | Artificial intelligence                                                |

|                           |      |                |                |        |                                                                 |
|---------------------------|------|----------------|----------------|--------|-----------------------------------------------------------------|
| Marshall <sup>142</sup>   | 2018 | United Kingdom | Digital Health | Review | Online consulting in primary care (e.g. GP at hand)             |
| Marwick <sup>143</sup>    | 2016 | Australia      | Diagnostics    | Review | Portable ultrasound as physical examination device (PUPED)      |
| McGinniss <sup>144</sup>  | 2015 | USA            | Basic Science  | Review | Next generation sequencing                                      |
| McKinlay <sup>145</sup>   | 2012 | USA            | Processes      | Review | Retail clinics                                                  |
| Mehta <sup>146</sup>      | 2013 | USA            | Education      | Review | Online course for medical education                             |
| Mesko <sup>147</sup>      | 2017 | Hungary        | Digital Health | Review | Digital health, AI, wearable technology, robotics, telemedicine |
| Michaelis <sup>148</sup>  | 2004 | USA            | Device         | Review | Drug eluting stents                                             |
| Moerenhout <sup>149</sup> | 2018 | Belgium        | Digital Health | Review | E-Health - "Dr Google" and electronic health records            |
| Monteith <sup>150</sup>   | 2013 | USA            | Technique      | Review | Transcranial MR-guided focused ultrasound (MRgFUS) surgery      |

|                         |      |                |                |        |                                                                       |
|-------------------------|------|----------------|----------------|--------|-----------------------------------------------------------------------|
| Moore <sup>151</sup>    | 2017 | USA            | Basic Science  | Review | Use of perinatal tissue as allogenic biomaterial                      |
| Murino <sup>152</sup>   | 2016 | United Kingdom | Device         | Review | Capsule endoscopy                                                     |
| Naguib <sup>153</sup>   | 2017 | USA            | Device         | Review | Sugammadex                                                            |
| Nam <sup>154</sup>      | 2015 | USA            | Basic Science  | Review | Point of care testing                                                 |
| Nassiri <sup>155</sup>  | 2015 | USA            | Technique      | Review | Targeted prostate biopsy                                              |
| Nguyen <sup>156</sup>   | 2016 | USA            | Digital Health | Review | Smartphone technology in cardiology                                   |
| Niranjan <sup>157</sup> | 2012 | USA            | Technique      | Review | Intracranial radiosurgery                                             |
| Oo <sup>158</sup>       | 2015 | USA            | Basic Science  | Review | Use of nanotechnology to deliver therapies                            |
| Page <sup>159</sup>     | 2014 | USA            | Digital Health | Review | Cloud based privacy preserving remote ECG monitoring and surveillance |
| Pallen <sup>160</sup>   | 2010 | United Kingdom | Basic Science  | Review | High throughput DNA sequencing                                        |
| Palmieri <sup>161</sup> | 2011 | Peru           | Digital Health | Review | Health informatics                                                    |

|                          |      |             |                |                     |                                                       |
|--------------------------|------|-------------|----------------|---------------------|-------------------------------------------------------|
| Parikh <sup>162</sup>    | 2016 | USA         | Basic Science  | Review              | Blood based screening for colon cancer                |
| Parkinson <sup>163</sup> | 2009 | USA         | Basic Science  | Review              | Personalised medicine directing oncological treatment |
| Patel <sup>164</sup>     | 2006 | USA         | Diagnostics    | Observational trial | Portable ultrasound scanning                          |
| Paterick <sup>165</sup>  | 2009 | USA         | Processes      | Review              | Retail clinics                                        |
| Pauly <sup>166</sup>     | 2008 | USA         | Processes      | Review              | Health maintenance organisation                       |
| Pechacek <sup>167</sup>  | 2016 | USA         | Device         | Review              | Electronic nicotine delivery system                   |
| Perkins <sup>168</sup>   | 2016 | Australia   | Processes      | Review              | Health Care Homes                                     |
| Petito <sup>169</sup>    | 2017 | USA         | Digital Health | Review              | Telemedicine in Eye Care                              |
| Pinney <sup>170</sup>    | 2016 | USA         | Device         | Review              | Left ventricular assist device                        |
| Ptak <sup>171</sup>      | 2010 | USA         | Basic Science  | Review              | Nanotechnology                                        |
| Rao <sup>172</sup>       | 2018 | USA         | Processes      | Review              | Re-structuring of pharmacy benefit manager system     |
| Ratib <sup>173</sup>     | 2011 | Switzerland | Digital Health | Review              | Open source software                                  |



|                            |      |                |                |        |                                                           |
|----------------------------|------|----------------|----------------|--------|-----------------------------------------------------------|
| Reiner <sup>174</sup>      | 2013 | USA            | Digital Health | Review | Picture archiving and communication system (PACS)         |
| Reinhardt <sup>175</sup>   | 2013 | USA            | Processes      | Review | Price transparency in healthcare                          |
| Rifai <sup>176</sup>       | 2015 | USA            | Diagnostics    | Review | Point of care testing                                     |
| Roach <sup>177</sup>       | 2015 | USA            | Basic Science  | Review | Bacterial whole genome sequencing                         |
| Roberts <sup>178</sup>     | 2016 | Australia      | Technique      | Review | Femtosecond laser cataract surgery                        |
| Rosen <sup>179</sup>       | 2018 | United Kingdom | Digital Health | Review | GP at hand                                                |
| Rosenwasser <sup>180</sup> | 2017 | USA            | Technique      | Review | Neuro-endovascular surgery and use of tPA                 |
| Rothman <sup>181</sup>     | 2017 | USA            | Digital Health | Review | Mobile technology within healthcare                       |
| Saarel <sup>182</sup>      | 2017 | USA            | Device         | Review | Subcutaneous implantable cardioverter defibrillator (ICD) |
| Saffitz <sup>183</sup>     | 2012 | USA            | Basic Science  | Review | Next generation genomic sequencing                        |
| Said <sup>184</sup>        | 2010 | USA            | Technique      | Review | Thoracoscopy                                              |
| Sanchez <sup>185</sup>     | 2015 | USA            | Device         | Review | Bioresorbable stents                                      |

|                             |      |         |                |        |                                                          |
|-----------------------------|------|---------|----------------|--------|----------------------------------------------------------|
| Sanchez-Nino <sup>186</sup> | 2017 | Spain   | Basic Science  | Review | Clinical proteomics in kidney disease                    |
| Satava <sup>187</sup>       | 2003 | USA     | Technique      | Review | Biosurgery                                               |
| Schlesinger <sup>188</sup>  | 2013 | USA     | Technique      | Review | MR guided focused ultrasound surgery, present and future |
| Schulman <sup>189</sup>     | 2009 | USA     | Basic Science  | Review | Personalised medicine                                    |
| Schwamm <sup>190</sup>      | 2018 | USA     | Device         | Review | Tenecteplase                                             |
| Schwamm <sup>191</sup>      | 2014 | USA     | Digital Health | Review | Telemedicine                                             |
| Schwarz <sup>192</sup>      | 2016 | Germany | Processes      | Review | Diabetes health policy changes                           |
| Sensmeier <sup>193</sup>    | 2012 | USA     | Diagnostics    | Review | Glucose point of care testing                            |
| Settembre <sup>194</sup>    | 2014 | USA     | Basic Science  | Review | RNA based flu vaccine                                    |
| Shaikh <sup>195</sup>       | 2015 | USA     | Digital Health | Review | E-surveillance                                           |
| Sharma <sup>196</sup>       | 2017 | India   | Processes      | Review | Health tourism in India                                  |
| Shekarian <sup>197</sup>    | 2015 | France  | Basic Science  | Review | Targeting immune system as cancer therapy                |
| Shih <sup>198</sup>         | 2010 | USA     | Digital Health | Review | Mobile Health                                            |

|                           |      |                |                |        |                                                               |
|---------------------------|------|----------------|----------------|--------|---------------------------------------------------------------|
| Shimada <sup>199</sup>    | 2013 | USA            | Digital Health | Review | Asynchronous telemedicine                                     |
| Shoemaker <sup>200</sup>  | 2002 | USA            | Basic Science  | Review | DNA micro-arrays                                              |
| Skiba <sup>201</sup>      | 2017 | USA            | Digital Health | Review | Health information technology                                 |
| Slavin <sup>202</sup>     | 2012 | USA            | Technique      | Review | Endovascular surgery                                          |
| Smith <sup>203</sup>      | 2007 | USA            | Technique      | Review | Coronary angioplasty                                          |
| Smith <sup>204</sup>      | 2013 | USA            | Technique      | Review | Thoracic trauma techniques - TEVAR                            |
| Spaide <sup>205</sup>     | 2018 | USA            | Diagnostics    | Review | Optical conference tomography                                 |
| Spinks <sup>206</sup>     | 2017 | Australia      | Digital Health | Review | Automated dispensation in Pharmacy                            |
| Srinivasan <sup>207</sup> | 2013 | USA            | Processes      | Review | Single procedure hospitals                                    |
| Stimson <sup>208</sup>    | 2014 | United Kingdom | Device         | Review | E-cigarettes                                                  |
| Stortecky <sup>209</sup>  | 2013 | Switzerland    | Technique      | Review | TAVI                                                          |
| Sultan <sup>210</sup>     | 2018 | Ireland        | Technique      | Review | Streamliner Multilayer Flow Modulator in endovascular surgery |

|                                |      |             |                |        |                                              |
|--------------------------------|------|-------------|----------------|--------|----------------------------------------------|
| Svensson <sup>211</sup>        | 2008 | USA         | Technique      | Review | TAVI                                         |
| Swendeman <sup>212</sup>       | 2015 | USA         | Digital Health | Review | Smartphone self-monitoring                   |
| Swisher-McClure <sup>213</sup> | 2015 | USA         | Diagnostics    | Review | Glucose point of care testing                |
| Tarantini <sup>214</sup>       | 2018 | Italy       | Technique      | Review | TAVI                                         |
| Tegos <sup>215</sup>           | 2013 | USA         | Basic Science  | Review | New anti-infective medication                |
| Thompson <sup>216</sup>        | 2016 | USA         | Education      | Review | Distance learning                            |
| Tice <sup>217</sup>            | 2002 | USA         | Processes      | Review | Retail clinic                                |
| Tursz <sup>218</sup>           | 2015 | France      | Basic Science  | Review | Genomics in personalised cancer treatment    |
| Uriel <sup>219</sup>           | 2015 | USA         | Device         | Review | Mechanical circulatory support               |
| Ussui <sup>220</sup>           | 2015 | USA         | Device         | Review | Confocal Endomicroscopy of Colorectal Polyps |
| Vannier <sup>221</sup>         | 2003 | USA         | Diagnostics    | Review | Craniofacial CT scanning                     |
| Veith <sup>222</sup>           | 2008 | USA         | Technique      | Review | Carotid artery stenting                      |
| Veld <sup>223</sup>            | 2011 | Netherlands | Digital Health | Review | Telemedicine                                 |
| Verhees <sup>224</sup>         | 2017 | Netherlands | Digital Health | Review | Point of care testing informatic integration |

|                          |      |           |                |        |                                                     |
|--------------------------|------|-----------|----------------|--------|-----------------------------------------------------|
| Vetter <sup>225</sup>    | 2015 | USA       | Processes      | Review | Perioperative Surgical Home                         |
| Vinks <sup>226</sup>     | 2017 | USA       | Basic Science  | Review | Genomics                                            |
| Vinn <sup>227</sup>      | 2010 | USA       | Processes      | Review | Residentialist - home visits for high risk patients |
| Wade <sup>228</sup>      | 2014 | USA       | Basic Science  | Review | Genomics                                            |
| Wagner <sup>229</sup>    | 2001 | USA       | Digital Health | Review | Information technology                              |
| Walcott <sup>230</sup>   | 2016 | USA       | Technique      | Review | Flow diversion in neurosurgical procedures          |
| Warsof <sup>231</sup>    | 2015 | USA       | Technique      | Review | Non-invasive prenatal testing                       |
| Weaver <sup>232</sup>    | 2014 | USA       | Technique      | Review | Endovascular surgery                                |
| Weinstein <sup>233</sup> | 2014 | USA       | Digital Health | Review | Mobile Health                                       |
| Westbrook <sup>133</sup> | 2012 | Australia | Digital Health | Review | ICT                                                 |
| Wheler <sup>234</sup>    | 2014 | USA       | Basic Science  | Review | Applied genomics                                    |
| White <sup>235</sup>     | 2008 | USA       | Digital Health | Review | Electronic medical records                          |

|                            |      |             |                |        |                                                                     |
|----------------------------|------|-------------|----------------|--------|---------------------------------------------------------------------|
| Wiederhold <sup>236</sup>  | 2015 | USA         | Digital Health | Review | mHealth in ED                                                       |
| Windle <sup>237</sup>      | 2003 | USA         | Digital Health | Review | Computerised physician order entry                                  |
| Wissing <sup>238</sup>     | 2017 | Netherlands | Basic Science  | Review | In situ tissue engineering                                          |
| Wu <sup>239</sup>          | 2017 | USA         | Basic Science  | Review | Dried Blood Spot test for TAC, cyclosporine A and creatinine levels |
| Yates <sup>240</sup>       | 2013 | USA         | Basic Science  | Review | Shotgun proteomics                                                  |
| Yellowlees <sup>241</sup>  | 2012 | USA         | Digital Health | Review | Asynchronous Telepsychiatry                                         |
| Yeo <sup>242</sup>         | 2017 | Singapore   | Device         | Review | Bio-artificial graft for vascular access                            |
| Yoo <sup>243</sup>         | 2015 | USA         | Device         | Review | 3D printing                                                         |
| Ziai <sup>244</sup>        | 2012 | USA         | Digital Health | Review | Digital pathology                                                   |
| Zimilichman <sup>245</sup> | 2013 | USA         | Processes      | Review | Payment reform and policy changes (Medicare and Medicaid)           |
